# Supplementary material
Source: PubMed Central journal article supplement (PMC7647666)
Supplement: mmc1.pdf [file mmc1.pdf]

**Supplemental Information**

**Dual Targeting of Mesothelin and CD19**

**with Chimeric Antigen Receptor-Modified**

**T Cells in Patients with Metastatic Pancreatic Cancer**

**Andrew H. Ko, Alexander C. Jordan, Evan Tooker, Simon F. Lacey, Renee B. Chang, Yan Li, Alan P. Venook, Margaret Tempero, Lloyd Damon, Lawrence Fong, Mark H. O'Hara, Bruce L. Levine, J. Joseph Melenhorst, Gabriela Plesa, Carl H. June, and Gregory L. Beatty**

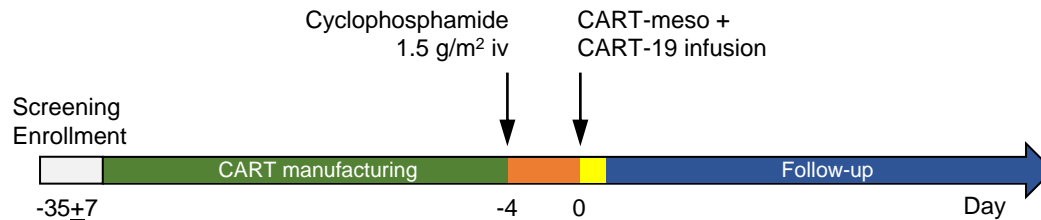

**Supplementary Figure 1. Study Schema.** Eligible patients underwent screening and leukopheresis. CAR T cells were manufactured. Patients then received a single dose of cyclophosphamide (1.5 g/m<sup>2</sup>) on day -4 prior to receiving a 1:1 mixture of CART-Meso (3x10<sup>7</sup> cells/m<sup>2</sup>) and CART-19 (3x10<sup>7</sup> cells/m<sup>2</sup>) cells administered on day 0. Patients were followed for safety and blood samples were collected at defined timepoints prior to and post CART cell administration.

**Supplementary Table 1. CART-meso cell product characteristics**

| <b>Patient</b> | <b>CD45<sup>+</sup> CD3<sup>+</sup></b> | <b>CD3<sup>+</sup> CD4<sup>+</sup></b> | <b>CD45<sup>+</sup> CD3<sup>+</sup> CD4<sup>+</sup></b> | <b>%CD3<sup>+</sup> CD8<sup>+</sup></b> | <b>CD45<sup>+</sup> CD3<sup>+</sup> CD8<sup>+</sup></b> | <b>CD4:CD8 ratio</b> | <b>% scFV</b> | <b>Viability</b> |
|----------------|-----------------------------------------|----------------------------------------|---------------------------------------------------------|-----------------------------------------|---------------------------------------------------------|----------------------|---------------|------------------|
| 19214-01       | 95.80%                                  | 81.70%                                 | 78.30%                                                  | 23.30%                                  | 22.30%                                                  | 3.51                 | 27.60%        | 95.80%           |
| 19214-03       | 97.20%                                  | 67.90%                                 | 66.00%                                                  | 35.60%                                  | 34.60%                                                  | 1.91                 | 34.10%        | 97.60%           |
| 19214-04       | 98.00%                                  | 69.40%                                 | 68.00%                                                  | 34.00%                                  | 33.30%                                                  | 2.04                 | 49.40%        | 100.00%          |

**Supplementary Table 2. CART-19 cell product characteristics**

| <b>Patient</b> | <b>CD45<sup>+</sup> CD3<sup>+</sup></b> | <b>CD3<sup>+</sup> CD4<sup>+</sup></b> | <b>CD45<sup>+</sup> CD3<sup>+</sup> CD4<sup>+</sup></b> | <b>%CD3<sup>+</sup> CD8<sup>+</sup></b> | <b>CD45<sup>+</sup> CD3<sup>+</sup> CD8<sup>+</sup></b> | <b>CD4:CD8 ratio</b> | <b>% scFV</b> | <b>Viability</b> |
|----------------|-----------------------------------------|----------------------------------------|---------------------------------------------------------|-----------------------------------------|---------------------------------------------------------|----------------------|---------------|------------------|
| 19214-01       | 98.00%                                  | 80.90%                                 | 79.30%                                                  | 21.60%                                  | 21.20%                                                  | 3.74                 | 5.57%         | 99.00%           |
| 19214-03       | 98.40%                                  | 66.70%                                 | 65.60%                                                  | 35.80%                                  | 35.20%                                                  | 1.86                 | 29.20%        | 97.10%           |
| 19214-04       | 98.60%                                  | 71.60%                                 | 70.60%                                                  | 30.10%                                  | 29.70%                                                  | 2.38                 | 31.80%        | 100.00%          |

**Supplementary Table 3. Human anti-mouse antibody quantification in patient sera**

| <b>Subject</b> | <b>Pre-infusion</b> | <b>Day 21-28</b> | <b>Month 2</b> |
|----------------|---------------------|------------------|----------------|
| 19214-01       | nd                  | nd               | nd             |
| 19214-03       | 26.5                | 9.66             | 6.05           |
| 19214-04       | nd                  | nd               | na             |

HAMA=ng/mL; na, not assessed; nd, not detected
